# Supplementary material
Source: ML conference proceedings conference paper supplement (https://openaccess.thecvf.com/content/ICCV2023/html/Han_Towards_Attack-tolerant_Federated_ICCV_2023_paper.html)
Supplement: Supplementary file 1 [file Han_Towards_Attack-tolerant_Federated_ICCV_2023_supplemental.pdf]

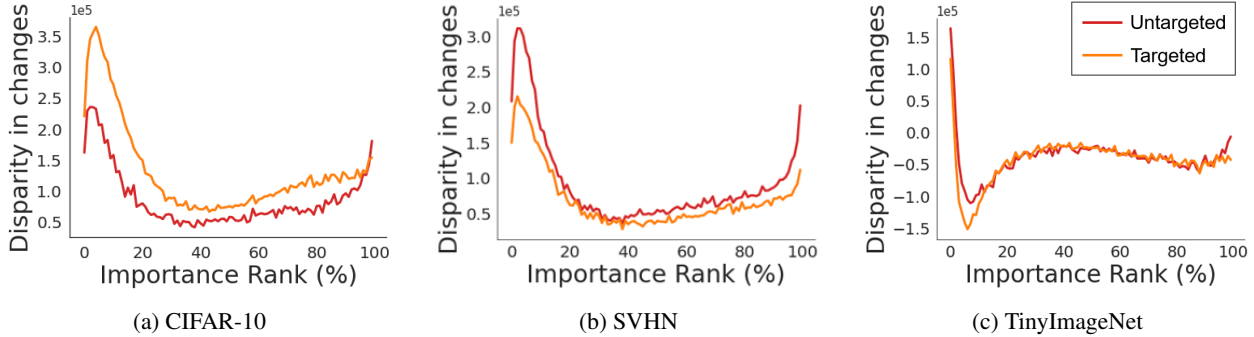

Figure 4: Comparison of change patterns over three datasets under two different poisoning attack scenarios, untargeted and targeted attack, where the disparity is measured by the difference in changes of importance rank between benign and poisoned models after one training round.

## A. Appendix

### A.1. Release & Implementation details

We adopt ResNet18 as the default backbone architecture, building upon prior research in federated learning [14, 10]. In the case of the targeted attack, we follow the original literature [9] and generate a noise input pattern called a backdoor. The size of the backdoor is set to  $5 \times 5$ , and its location is in the bottom-right corner of the images. For the untargeted Gaussian attack, we set the standard deviation of the Gaussian noise to 0.05.

We follow the original works’ implementations and hyper-parameter settings to reproduce all baselines. For Multi-Krum and Norm Bounding algorithms, we assume the central server already knows the upper bound of attacker numbers when deciding on hyper-parameters. The confidence interval and clipping threshold in the ResidualBase algorithm are set to 2.0 and 0.05, respectively. We calculate the geometric mean for RFA by setting the smoothing parameter to  $1e-6$  and the maximum number of Weiszfeld iterations to 100. More details on implementations are at <https://github.com/Sungwon-Han/FEDCPA>.

### A.2. Time Complexity Analysis

For all experiments, we utilized four A100 GPUs. Table 7 compares the time costs in seconds of every defense strategy per each round of training. Note that FedCPA is not a huge burden and only took 10% more processing time than the classical FedAvg algorithm (i.e., No Defense).

### A.3. Extra Results on Critical Parameter Analysis

In Section 4, we have shown that benign and poisoned local models exhibit distinct patterns in terms of parameter importance, with the poisoned model causing more significant disruptions to the top and bottom parameters. We conducted the same analysis across different datasets to validate our observation. The results of our analysis are presented in Figure 4, which compares the change patterns in importance rank between benign and poisoned models under two different attack scenarios, untargeted and targeted attacks. For the untargeted attack scenario, we used the label flipping attack method. After one training round, We measure the disparity in importance rank between benign and poisoned

| Method       | Time costs in seconds |
|--------------|-----------------------|
| No Defense   | 87                    |
| Median       | 86                    |
| Trimmed Mean | 87                    |
| Multi Krum   | 87                    |
| FoolsGold    | 90                    |
| Norm Bound   | 86                    |
| RFA          | 91                    |
| ResidualBase | 185                   |
| FedCPA       | 96                    |

Table 7: Comparison on time complexity among defense strategies against poisoning attacks. The CIFAR-10 dataset is used for the analysis.

models. The results demonstrate that our observation remains consistent across the various datasets.

### A.4. Extra Results on Robustness Tests

We evaluate the robustness of FedCPA through experiments conducted under different settings, varying key simulation parameters such as (a) the number of malicious clients  $|C_m|$ , (b) the total number of participating clients  $N$ , and (c) the degree of non-IIDness, controlled by the  $\beta$  parameter in the Dirichlet distribution. A lower  $\beta$  value results in a higher level of non-IIDness.

This section presents additional comparison results among different defense strategies under an untargeted attack scenario (i.e., label flipping attack) on the CIFAR-10 dataset. Results presented in Figure 5 show that FedCPA consistently performs comparably well despite variations in simulation parameters.

### A.5. Full Results on Performance Evaluation

Table 8-12 shows the complete evaluation results on defense performance over three datasets under various poisoning attack scenarios: targeted attack with  $\gamma_p = 0.5, 0.8$ , untargeted label flipping attack with  $\gamma_p = 0.8, 1.0$ , and untargeted Gaussian attack. The results are obtained by averaging over the last ten rounds and are reported with mean and standard deviation values.

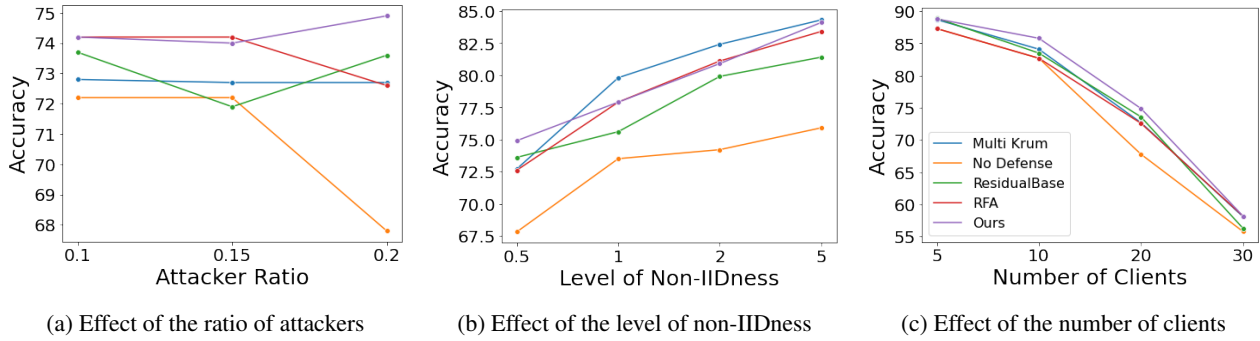

Figure 5: Robustness test results under label flipping attack across different simulation hyper-parameters: (a) the attacker ratio, (b) the level of non-IIDness, and (c) the number of clients over the CIFAR-10 dataset.

| Method<br>( $\gamma_p = 0.5$ ) | CIFAR-10   |            | SVHN      |            | TinyImageNet |            |
|--------------------------------|------------|------------|-----------|------------|--------------|------------|
|                                | ACC        | ASR        | ACC       | ASR        | ACC          | ASR        |
| No Defense                     | 72.1±3.07  | 71.0±0.61  | 93.0±0.48 | 22.2±12.02 | 39.5±2.71    | 96.6±0.41  |
| Median                         | 65.6±3.54  | 77.8±1.09  | 90.7±0.44 | 23.0±7.02  | 32.5±3.43    | 96.1±0.58  |
| Trimmed Mean                   | 70.1±3.15  | 51.4±0.82  | 92.2±0.57 | 20.9±20.66 | 39.3±1.13    | 97.2±0.26  |
| Multi Krum                     | 69.9±0.89  | 63.8±1.24  | 92.1±0.82 | 21.4±10.88 | 37.1±2.85    | 74.6±6.93  |
| FoolsGold                      | 45.5±12.24 | 54.3±18.25 | 79.6±5.32 | 23.5±36.78 | 24.3±7.37    | 92.4±14.82 |
| Norm Bound                     | 68.2±4.12  | 61.2±25.00 | 93.1±0.69 | 20.8±0.91  | 36.6±0.38    | 96.7±0.69  |
| RFA                            | 72.8±3.09  | 56.4±13.52 | 92.3±1.09 | 20.8±1.57  | 37.1±0.48    | 93.9±0.63  |
| ResidualBase                   | 70.6±3.12  | 59.9±0.61  | 93.1±0.34 | 21.1±15.45 | 39.6±1.27    | 96.9±0.19  |
| FedCPA                         | 68.8±3.74  | 21.9±0.73  | 93.3±9.36 | 20.6±2.69  | 30.1±1.51    | 43.2±44.66 |

Table 8: Comparison of defense performance over three datasets under targeted attack scenarios with pollution ratio  $\gamma_p = 0.5$ . Mean and standard deviation over ten last rounds are reported.

| Method<br>( $\gamma_p = 0.8$ ) | CIFAR-10  |            | SVHN       |            | TinyImageNet |            |
|--------------------------------|-----------|------------|------------|------------|--------------|------------|
|                                | ACC       | ASR        | ACC        | ASR        | ACC          | ASR        |
| No Defense                     | 69.3±3.74 | 50.9±25.09 | 92.5±0.93  | 22.0±2.21  | 38.8±1.12    | 96.1±1.34  |
| Median                         | 62.4±3.32 | 70.6±16.51 | 90.0±1.53  | 23.6±3.39  | 31.5±0.99    | 96.2±0.59  |
| Trimmed Mean                   | 71.4±2.77 | 19.0±10.29 | 91.7±1.25  | 21.4±1.78  | 37.9±1.12    | 97.0±0.81  |
| Multi Krum                     | 69.0±2.21 | 40.4±21.85 | 90.7±2.33  | 23.4±4.06  | 36.3±1.78    | 19.0±13.91 |
| FoolsGold                      | 49.1±9.46 | 46.8±34.83 | 69.8±24.56 | 32.3±27.72 | 28.5±4.27    | 69.1±43.20 |
| Norm Bound                     | 64.9±4.28 | 53.1±30.29 | 92.7±1.31  | 20.9±1.42  | 35.7±1.00    | 97.1±0.83  |
| RFA                            | 70.1±3.37 | 44.8±21.58 | 91.8±1.44  | 22.1±2.01  | 36.3±1.05    | 11.4±5.80  |
| ResidualBase                   | 69.9±3.59 | 54.0±27.50 | 92.5±0.81  | 21.9±2.34  | 38.6±0.47    | 96.2±0.81  |
| FedCPA                         | 72.3±0.88 | 12.5±1.02  | 93.1±1.02  | 20.8±1.35  | 38.7±0.63    | 4.8±1.40   |

Table 9: Comparison of defense performance over three datasets under targeted attack scenarios with pollution ratio  $\gamma_p = 0.8$ . Mean and standard deviation over ten last rounds are reported.

| Method ( $\gamma_p = 0.8$ ) | CIFAR-10  | SVHN       | TinyImageNet |
|-----------------------------|-----------|------------|--------------|
| No Defense                  | 69.8±3.49 | 90.6±1.80  | 33.0±4.76    |
| Median                      | 59.8±3.16 | 89.9±1.55  | 28.7±4.73    |
| Trimmed Mean                | 72.9±3.47 | 91.0±1.49  | 34.1±3.73    |
| Multi Krum                  | 72.7±3.61 | 92.6±0.99  | 35.9±2.22    |
| FoolsGold                   | 18.6±7.53 | 47.6±19.76 | 4.6±3.36     |
| Norm Bound                  | 64.9±4.19 | 90.8±2.06  | 29.3±5.18    |
| RFA                         | 72.6±2.31 | 92.7±0.96  | 36.5±0.78    |
| ResidualBase                | 73.6±3.40 | 92.1±1.03  | 36.0±3.38    |
| FedCPA                      | 74.9±3.30 | 93.2±0.72  | 36.8±1.53    |

Table 10: Comparison of defense performance over three datasets under label flipping attack scenarios with pollution ratio  $\gamma_p = 0.8$ . Mean and standard deviation over ten last rounds are reported.

| Method ( $\gamma_p = 1.0$ ) | CIFAR-10   | SVHN       | TinyImageNet |
|-----------------------------|------------|------------|--------------|
| No Defense                  | 63.8±5.85  | 86.1±5.21  | 24.4±8.94    |
| Median                      | 56.8±7.23  | 89.6±2.49  | 21.2±8.71    |
| Trimmed Mean                | 66.2±5.12  | 87.9±3.97  | 27.2±8.25    |
| Multi Krum                  | 73.0±3.78  | 92.6±1.42  | 35.9±3.10    |
| FoolsGold                   | 24.9±10.72 | 41.9±17.53 | 1.3±1.60     |
| Norm Bound                  | 63.5±4.45  | 86.6±7.05  | 24.1±8.86    |
| RFA                         | 71.5±2.66  | 92.4±1.06  | 36.3±1.12    |
| ResidualBase                | 70.3±3.95  | 91.8±1.38  | 30.5±8.23    |
| FedCPA                      | 74.4±2.85  | 93.2±0.57  | 34.9±2.18    |

Table 11: Comparison of defense performance over three datasets under label flipping attack scenarios with pollution ratio  $\gamma_p = 1.0$ . Mean and standard deviation over ten last rounds are reported.

| Method       | CIFAR-10  | SVHN       | TinyImageNet |
|--------------|-----------|------------|--------------|
| No Defense   | 32.7±4.18 | 47.8±8.72  | 2.1±1.09     |
| Median       | 67.8±4.30 | 91.5±1.21  | 28.8±3.44    |
| Trimmed Mean | 55.6±4.38 | 72.5±9.72  | 12.1±5.63    |
| Multi Krum   | 52.8±5.86 | 68.4±13.72 | 15.0±4.55    |
| FoolsGold    | 13.9±4.13 | 6.7±0.00   | 0.5±0.08     |
| Norm Bound   | 28.2±2.49 | 42.9±10.39 | 1.2±0.67     |
| RFA          | 72.0±2.85 | 92.2±0.49  | 35.8±0.80    |
| ResidualBase | 74.6±2.11 | 93.7±0.39  | 37.0±1.05    |
| FedCPA       | 74.8±2.42 | 93.6±0.58  | 36.1±1.37    |

Table 12: Comparison of defense performance over three datasets under Gaussian noise attack scenarios. Mean and standard deviation over ten last rounds are reported.
